# Supplementary material
Source: Elsevier journal article supplement (https://pure.mpg.de/pubman/item/item_2515661_4/component/file_2517766/mmc1.pdf)
Supplement: mmc1 [file mmc1.pdf]

## Supplementary Materials

### *Pre-test 1: Eliciting shared traits for object pairs*

First, 197 pairs of pictures that appeared to share at least one feature were selected from the Snodgrass picture set (Snodgrass & Vanderwart, 1980). We performed a first pre-test on these 197 picture pairs to elicit a set of traits that participants saw as shared for each object pair (e.g., *fruit* for the banana-pineapple pair) yielding both frequent and infrequent traits associated with each pair.

*Pretest 1a.* Thirty-six native Dutch speakers saw the 197 picture pairs in a web-based experiment and responded to each pair with 1–3 traits that the two objects shared. Of the 197 pairs, 126 (66.7%) had at least one trait that was mentioned by at least 50% of participants (e.g., *animal* for the tiger-zebra pair), and 22 (11.7%) pairs had a second trait mentioned by at least 50% of participants (e.g., *stripes* for the tiger-zebra pair).

*Pretest 1b.* To add more stimulus options, we tested an additional 11 pairs with 27 more native Dutch-speaking participants, yielding another 9 object pairs with at least one trait mentioned by at least 50% of participants. We then selected 120 object pairs for further testing such that each pair had a frequent trait (used by more than 50% of participants) that was unique to that pair.<sup>1</sup>

### *Pre-test 2: Verifying the status of informative and uninformative cues in the questions*

For each of those 120 pairs we then selected an expected uninformative (shared) cue, an unexpected uninformative cue, and an informative cue. The expected uninformative cue was the frequent trait (mentioned by at least 50% of participants) unique to that pair (see above). The unexpected uninformative cue was a low-frequency shared trait unique to that pair (used by a maximum of 3 participants; e.g., *mammal* for the tiger-zebra pair). Finally, an informative cue was generated for each pair that uniquely identified one of the two objects (e.g., *eats meat* for the tiger-zebra pair; *curved* for the banana-pineapple pair). Using these three cues, questions were

---

<sup>1</sup> For example, *animal* was the most frequent shared trait for both the dog-horse pair and the tiger-zebra pair, but *stripes* was also used for the tiger-zebra pair by more than 50% of participants. We therefore used *animal* for the dog-horse pair and *stripes* for the tiger-zebra pair.

formulated for each picture pair in each of the 4 conditions of the experiment (see Table 1).

We then conducted a second pre-test to ensure that, for each stimulus pair (e.g., tiger/zebra), the uninformative cues (e.g., *stripes/mammal*) applied equally to each of the two objects and the informative cue (e.g., *eats meat*) uniquely identified one of the two objects. Importantly, our main experiment depends on the idea that participants should not know which object they should respond with until they hear the informative cue. Therefore, to ensure that only the informative cues could be used to identify the correct object in each pair, we pre-tested parts of the questions in each condition for each of the 120 stimulus sets.

Participants were presented with three different partial questions, based on the experimental questions, all of them up to two different positions in the question. The informative only questions were first presented up to but not including the text preceding the critical cue (e.g., *which object only eats...?*) and then up to and including the critical cue (e.g., *which object only eats meat?*). The expected and unexpected uninformative conditions were first presented with only the uninformative part (e.g., *which object has stripes?* and *which object is a mammal?*, respectively) and then up until just before the informative cue (e.g., *which object has stripes and only eats ...?* and *which object is a mammal and only eats ...?*, respectively). The unfinished questions were included in the pretest to make sure that the text leading up to the informative cue would not already bias participants in a certain direction.

*Pretest 2a.* We asked 48 native Dutch speakers in a web-based pretest to view each object pair together with the two versions of one of the conditions and guess which object was being referred to. Participants responded by clicking on one of the two objects or on a question mark (to indicate insufficient information to make a choice). Each participant completed 60 informative partial question trials, 30 expected uninformative partial question trials, and 30 unexpected uninformative partial question trials, with items balanced across participants in four lists ( $N = 12$  per list). On the basis of the results of this pretest, we identified items that led to different types of undesirable consequences. First, items for which the informative cue did not lead to high enough numbers of correct answers (i.e.,  $< 90\%$ ) were adjusted to more clearly point to the correct picture. Second, items for which the uninformative (expected or unexpected) cue biased participants too much towards one or the other picture (i.e.,  $> 75\%$ ) were adjusted to make them more ambiguous. Third, items for which the

information preceding any of the cues biased participants too much in the direction of one of the two pictures (i.e., > 75%) were adjusted to make this preceding information more ambiguous.

*Pretest 2b.* We then asked 63 native Dutch speakers in to participate in a web-based pretest that was identical to the one described above, but used the new, adjusted items (partial questions), together with all items that yielded good enough results in the previous pretest already. Items were balanced across participants in four lists (N = 15–17 per list).

Participants' choices were at chance following uninformative cues; they chose the correct item 14%–86% of the time across items (mean: 53% for expected cues and 52% for unexpected cues; between 25% and 75% on 91% of the 120 items).

Participants' choices were overwhelmingly correct following informative cues; they chose the correct item 80%–100% of the time across items (mean: 98%; above 90% on 98% of the 120 items).



Correlations with average response time by electrode

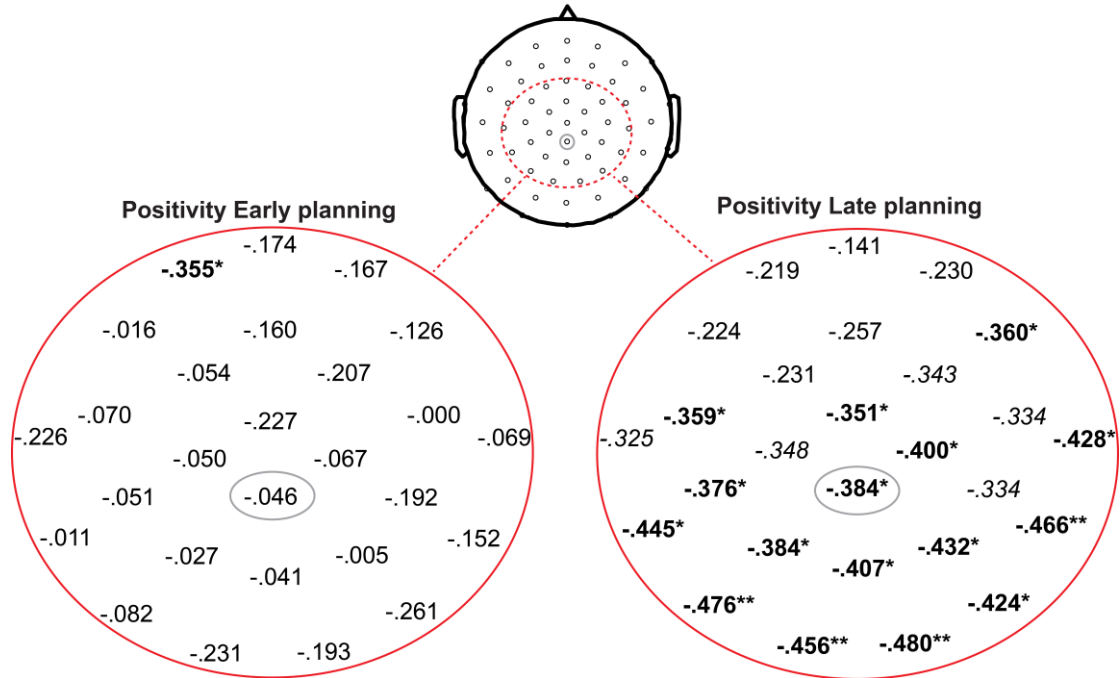

**Figure S2. Correlations between response time and positive effects in the early (left) and late conditions (right) for a larger set of electrodes.** Significant correlations are in bold (\* < .05; \*\* < .01) and marginally significant ones in italics. The electrode reported in the Results section (see. e.g., Figure 9) is circled in gray.

## Supplementary Table

**Table S1. All experimental items used in the EEG experiment, shown in Dutch (original) and English (approximate translation).** Each item was presented in four different conditions in the experiment (A–D; Table 1). Two questions are displayed for each item: the first question shows the early-planning conditions (A: expected-word and B: unexpected-word), and the second shows the late-planning conditions (C: expected-word and D: unexpected-word). The two parts in the parentheses for each question represent the parts containing the expected and unexpected words, respectively.

|   |                                                                                                                                                                                                       |                                                                                       |
|---|-------------------------------------------------------------------------------------------------------------------------------------------------------------------------------------------------------|---------------------------------------------------------------------------------------|
| 1 | Welk object hinnikt en wordt als (dier)/(viervoeter) geclassificeerd?<br>Which object neighs and is classified as (an animal)/(a quadruped)?                                                          |    |
|   | Welk object wordt als (dier)/(viervoeter) geclassificeerd en hinnikt?<br>Which object is classified as (an animal)/(a quadruped) and neighs?                                                          |                                                                                       |
| 2 | Welk object loeit en (is op de boerderij te vinden)/(wordt soms voor de slacht gehouden)?<br>Which object moos and (can be found on a farm)/(is sometimes bred for slaughter)?                        |    |
|   | Welk object (is op de boerderij te vinden)/(wordt soms voor de slacht gehouden) en loeit?<br>Which object (can be found on a farm)/(is sometimes bred for slaughter) and moos?                        |                                                                                       |
| 3 | Welk object is gemaakt van was en (heeft met vuur te maken)/(is langwerpig van vorm)?<br>Which object is made out of wax and (is related to fire)/(has an elongated shape)?                           |   |
|   | Welk object is (heeft met vuur te maken)/(is langwerpig van vorm) en is gemaakt van was?<br>Which object (is related to fire)/(has an elongated shape) and is made out of wax?                        |                                                                                       |
| 4 | Welk object gebruik je als je gaat eten en (wordt tot het meubilair gerekend)/(is rechthoekig van vorm)?<br>Which object is used when eating and (is considered furniture)/(has a rectangular shape)? |  |
|   | Welk object (wordt tot het meubilair gerekend)/(is rechthoekig van vorm) en gebruik je als je gaat eten?<br>Which object (is considered furniture)/(has a rectangular shape) and is used when eating? |                                                                                       |

|   |                                                                                                                                                                                                              |                                                                                                                                                                           |
|---|--------------------------------------------------------------------------------------------------------------------------------------------------------------------------------------------------------------|---------------------------------------------------------------------------------------------------------------------------------------------------------------------------|
| 5 | <p>Welk object is afkomstig van een boom en heeft met (eten)/(goedkoop) te maken?<sup>2</sup><br/>Which object comes from a tree and is related to (food)/(cheapness)?</p>                                   | 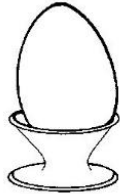    |
|   | <p>Welk object heeft met (eten)/(goedkoop) te maken en is afkomstig van een boom?<br/>Which object is related to (food)/(cheapness) and comes from a tree?</p>                                               |                                                                                                                                                                           |
| 6 | <p>Welk object heeft een haak en (wordt voor prikken gebruikt)/(is meestal van metaal gemaakt)?<br/>Which object has a hook and is (used for injections)/(usually made out of metal)?</p>                    |     |
|   | <p>Welk object (wordt voor prikken gebruikt)/(is meestal van metaal gemaakt) en heeft een haak?<br/>Which object is (used for injections)/(usually made out of metal) and has a hook?</p>                    |                                                                                                                                                                           |
| 7 | <p>Welk object is doorzichtig en (wordt gebruikt om drinken in te doen)/(moet je wassen na gebruik)?<br/>Which object is see-through and (is used to pour drinks in)/(has to be washed up after usage)?</p>  |     |
|   | <p>Welk object (wordt gebruikt om drinken in te doen) )(moet je wassen na gebruik) en is doorzichtig?<br/>Which object (is used to pour drinks in)/(has to be washed up after usage) and is see-through?</p> |                                                                                                                                                                           |
| 8 | <p>Welk object heeft conducteurs en (wordt als vervoer gebruikt)/(heeft met beweging te maken)?<br/>Which object has conductors and (is used for transportation)/(is related to movement)?</p>               |   |
|   | <p>Welk object (wordt als vervoer gebruikt) )(heeft met beweging te maken) en heeft conducteurs?<br/>Which object (is used for transportation)/(is related to movement) and has conductors?</p>              |                                                                                                                                                                           |

<sup>2</sup> "Cheapness" derives from a Dutch expression "kopen voor een appel en een ei" (buy for an apple and an egg; buy for cheap).

|    |                                                                                                                                                                                                   |                                                                                                                                                                             |
|----|---------------------------------------------------------------------------------------------------------------------------------------------------------------------------------------------------|-----------------------------------------------------------------------------------------------------------------------------------------------------------------------------|
| 9  | <p>Welk object heeft een antenne en is gemaakt om (geluid)/(trillingen) te produceren?<br/>Which object has an antenna and is made to produce (sound)/(vibrations)?</p>                           |       |
|    | <p>Welk object is gemaakt om (geluid)/(trillingen) te produceren en heeft een antenne?<br/>Which object is made to produce (sound)/(vibrations) and has an antenna?</p>                           |                                                                                                                                                                             |
| 10 | <p>Welk object heeft te maken met elektriciteit en (straalt licht uit)/(kan schijnen in het donker)?<br/>Which object is related to electricity and (emits light)/(can shine in the dark)?</p>    |       |
|    | <p>Welk object (straalt licht uit)/(en kan schijnen in het donker) en heeft te maken met elektriciteit?<br/>Which object (emits light)/(can shine in the dark) and is related to electricity?</p> |                                                                                                                                                                             |
| 11 | <p>Welk object heeft een slurf en is in de (dierentuin)/(jungle) te vinden?<br/>Which object has a trunk and can be found in the (zoo)/(jungle)?</p>                                              |       |
|    | <p>Welk object is in de (dierentuin)/(jungle) te vinden en heeft een slurf?<br/>Which object can be found in the (zoo)/(jungle) and has a trunk?</p>                                              |                                                                                                                                                                             |
| 12 | <p>Welk object is stekelig en is voor de (woestijn)/(Sahara) kenmerkend?<br/>Which object is prickly and is characteristic for the (desert)/(Sahara)?</p>                                         |     |
|    | <p>Welk object is voor de (woestijn)/(Sahara) kenmerkend en is stekelig?<br/>Which object is characteristic for the (desert)/(Sahara) and is prickly?</p>                                         |                                                                                                                                                                             |
| 13 | <p>Welk object heeft kraters en (is in de ruimte te vinden)/(heeft met NASA te maken)?<br/>Which object has craters and (can be found in space)/(is related to NASA)?</p>                         |   |
|    | <p>Welk object (is in de ruimte te vinden)/(heeft met NASA te maken) en heeft kraters?<br/>Which object (can be found in space)/(is related to NASA) and has craters?</p>                         |                                                                                                                                                                             |



|    |                                                                                                                                                                                                   |                                                                                       |
|----|---------------------------------------------------------------------------------------------------------------------------------------------------------------------------------------------------|---------------------------------------------------------------------------------------|
| 14 | Welk object heeft een wiel en wordt (bij het tuinieren)/(meestal in de buitenlucht) gebruikt?<br>Which object has a wheel and is (used for gardening)/(usually used outdoors)?                    | 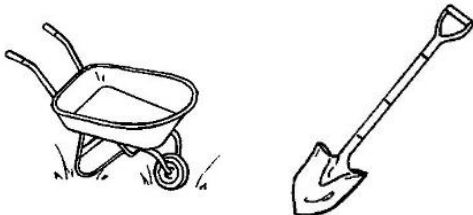   |
|    | Welk object wordt (bij het tuinieren)/(meestal in de buitenlucht) gebruikt en heeft een wiel?<br>Which object is (used for gardening)/(usually used outdoors) and has a wheel?                    |                                                                                       |
| 15 | Welk object is gespannen en (wordt voor een sport gebruikt)/(moet je bij het handvat vasthouden)?<br>Which object is strung and (is used for playing sports)/(do you need to hold by its handle)? |    |
|    | Welk object (wordt voor een sport gebruikt)/(moet je bij het handvat vasthouden) en is gespannen?<br>Which object (is used for playing sports)/(do you need to hold by its handle) and is strung? |                                                                                       |
| 16 | Welk object is gereedschap en (heeft met de bouw te maken)/(is rechthoekig van vorm)?<br>Which object is a tool and (is related to construction)/(has a rectangular shape)?                       |    |
|    | Welk object (heeft met de bouw te maken)/(is rechthoekig van vorm) en is gereedschap?<br>Which object (is related to construction)/(has a rectangular shape) and is a tool?                       |                                                                                       |
| 17 | Welk object is deel van een spijkerbroek en heeft met (sluiten)/(een kier) te maken?<br>Which object is part of a pair of jeans and is related to (fastening)/(a gap)?                            |   |
|    | Welk object heeft met (sluiten)/(een kier) te maken en is deel van een spijkerbroek?<br>Which object is related to (fastening)/(a gap) and is part of a pair of jeans?                            |                                                                                       |
| 18 | Welk object is gemaakt van melk en heeft met (smeren)/(een boterham) te maken?<br>Which object is made out of milk and is related to (spreading)/(a slice of bread)?                              |  |
|    | Welk object heeft met (smeren)/(een boterham) te maken en is gemaakt van melk?<br>Which object is related to (spreading)/(a slice of bread) and is made out of milk?                              |                                                                                       |

|    |                                                                                                                                                                                                                        |                                                                                       |
|----|------------------------------------------------------------------------------------------------------------------------------------------------------------------------------------------------------------------------|---------------------------------------------------------------------------------------|
| 19 | <p>Welk object is klein en (wordt voor spelen gebruikt)/(beweegt bij gebruik)?<br/>Which object is small and (is used for playing)/(moves when in use)?</p>                                                            | 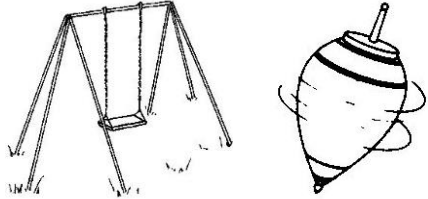   |
|    | <p>Welk object (wordt voor spelen gebruikt)/(beweegt bij gebruik) en is klein?<br/>Which object (moves when in use)/(is used for playing) and is small?</p>                                                            |                                                                                       |
| 20 | <p>Welk object is bedoeld voor twee personen en is in (de speeltuin)/(het park) te vinden?<br/>Which object is meant for two people and can be found (at the playground)/(in the park)?</p>                            |    |
|    | <p>Welk object is in (de speeltuin)/(het park) te vinden en is bedoeld voor twee personen?<br/>Which object can be found (at the playground)/(in the park) and is meant for two people?</p>                            |                                                                                       |
| 21 | <p>Welk object kan toveren en (beleeft met Aladdin veel avonturen)/(kan zich zwevend verplaatsen)?<br/>Which object performs magic and (experiences many adventures with Aladdin)/(can transport itself floating)?</p> |    |
|    | <p>Welk object (beleeft met Aladdin veel avonturen)/(kan zich zwevend verplaatsen) en kan toveren?<br/>Which object (experiences many adventures with Aladdin)/(can transport itself floating) and performs magic?</p> |                                                                                       |
| 22 | <p>Welk object heeft een staart en (komt vaak in sprookjes voor)/(heeft vaak ridders tegenover zich)?<br/>Which object has a tail and often (stars in fairy tales)/(faces knights)?</p>                                |   |
|    | <p>Welk object (komt vaak in sprookjes voor)/(heeft vaak ridders tegenover zich) en heeft een staart?<br/>Which object often (stars in fairy tales)/(faces knights) and has a tail?</p>                                |                                                                                       |
| 23 | <p>Welk object is voor drinken en heeft met (een baby)/(huilen) te maken?<br/>Which object is made for drinking and is related to (a baby)/(crying)?</p>                                                               |  |
|    | <p>Welk object heeft met (een baby)/(huilen) te maken en is voor drinken?<br/>Which object is related to (a baby)/(crying) and is made for drinking?</p>                                                               |                                                                                       |

|    |                                                                                                                                                                                |                                                                                       |
|----|--------------------------------------------------------------------------------------------------------------------------------------------------------------------------------|---------------------------------------------------------------------------------------|
| 24 | Welk object zoemt en heeft (vleugels op zijn rug)/(voelsprieten op zijn hoofd)?<br>Which object buzzes and has (wings on its back)/(antennae on its head)?                     | 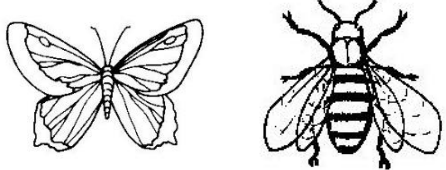   |
|    | Welk object heeft (vleugels op zijn rug)/(voelsprieten op zijn hoofd) en zoemt?<br>Which object has (wings on its back)/(antennae on its head) and buzzes?                     |                                                                                       |
| 25 | Welk object beweegt en (is op het strand te vinden)/(is hard van buiten)?<br>Which object moves and (can be found on the beach)/(is hard on the outside)?                      |    |
|    | Welk object (is op het strand te vinden)/(is hard van buiten) en beweegt?<br>Which object (can be found on the beach)/(is hard on the outside) and moves?                      |                                                                                       |
| 26 | Welk object heeft een bandje en (wijst de tijd aan)/(heeft batterijen nodig)?<br>Which object has a strap and (tells the time)/(needs batteries)?                              |    |
|    | Welk object (wijst de tijd aan)/(heeft batterijen nodig) en heeft een bandje?<br>Which object (tells the time)/(needs batteries) and has a strap?                              |                                                                                       |
| 27 | Welk object heeft mouwen en (is gemaakt om je warm te houden)/(heb je in de herfst nodig)?<br>Which object has sleeves and (is made to keep you warm)/(do you need in autumn)? |   |
|    | Welk object (is gemaakt om je warm te houden)/(heb je in de herfst nodig) en heeft mouwen?<br>Which object (is made to keep you warm)/(do you need in autumn) and has sleeves? |                                                                                       |
| 28 | Welk object is een vrucht en doet je aan (de tropen)/(het buitenland) denken?<br>Which object is a fruit and reminds you of (the tropics)/(being abroad)?                      |  |
|    | Welk object doet je aan (de tropen)/(het buitenland) denken en is een vrucht?<br>Which object reminds you of (the tropics)/(being abroad) and is a fruit?                      |                                                                                       |

|    |                                                                                                                                                                             |                                                                                       |
|----|-----------------------------------------------------------------------------------------------------------------------------------------------------------------------------|---------------------------------------------------------------------------------------|
| 29 | Welk object heeft een zadel en heeft met (het circus)/(trucs) te maken?<br>Which object has a saddle and is related to (the circus)/(tricks)?                               | 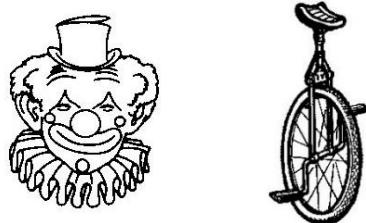   |
|    | Welk object heeft met (het circus)/(trucs) te maken en heeft een zadel?<br>Which object is related to (the circus)/(tricks) and has a saddle?                               |                                                                                       |
| 30 | Welk object heeft manen en heeft met (temmen)/(dresseren) te maken?<br>Which object has a mane and is related to (taming)/(dressage)?                                       |    |
|    | Welk object heeft met (temmen)/(dresseren) te maken en heeft manen?<br>Which object is related to (taming)/(dressage) and has a mane?                                       |                                                                                       |
| 31 | Welk object heeft wielen en wordt (in de tuin)/(vooral in de zomer) gebruikt?<br>Which object has wheels and is used (in the garden)/(mostly in summer)?                    |    |
|    | Welk object wordt (in de tuin)/(vooral in de zomer) gebruikt en heeft wielen?<br>Which object is used (in the garden)/(mostly in summer) and has wheels?                    |                                                                                       |
| 32 | Welk object kan rijden en heeft met (vallen)/(blessures) te maken?<br>Which object is rideable and is related to (falling)/(injuries)?                                      |   |
|    | Welk object heeft met (vallen)/(blessures) te maken en kan rijden?<br>Which object is related to (falling)/(injuries) and is rideable?                                      |                                                                                       |
| 33 | Welk object heeft een deurtje en heeft met (het vangen van dieren)/(een plaag) te maken?<br>Which object has a little door and is related to (catching animals)/(a plague)? |  |
|    | Welk object heeft met (het vangen van dieren)/(een plaag) te maken en heeft een deurtje?<br>Which object is related to (catching animals)/(a plague) and has a little door? |                                                                                       |

|    |                                                                                                                                                                                            |                                                                                       |
|----|--------------------------------------------------------------------------------------------------------------------------------------------------------------------------------------------|---------------------------------------------------------------------------------------|
| 34 | Welk object heeft haren en heeft met (opvegen)/(Assepoester) te maken?<br>Which object has bristles and is related to (sweeping)/(Cinderella)?                                             | 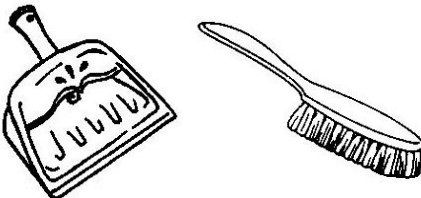   |
|    | Welk object heeft met (opvegen)/(Assepoester) te maken en heeft haren?<br>Which object is related to (sweeping)/(Cinderella) and has bristles?                                             |                                                                                       |
| 35 | Welk object rijdt en wordt (bij verhuizen)/(voor goederen) gebruikt?<br>Which object can be driven and is used for (moving house)/(goods)?                                                 |    |
|    | Welk object wordt (bij verhuizen)/(voor goederen) gebruikt en rijdt?<br>Which object is used for (moving house)/(goods) and can be driven?                                                 |                                                                                       |
| 36 | Welk object piept en (wordt als knaagdier geclassificeerd)/(is in het bos te vinden)?<br>Which object squeaks and (is classified as a rodent)/(can be found in the woods)?                 |    |
|    | Welk object (wordt als knaagdier geclassificeerd)/(is in het bos te vinden) en piept?<br>Which object (is classified as a rodent)/(can be found in the woods) and squeaks?                 |                                                                                       |
| 37 | Welk object heeft wielen en heeft met (het verkeer)/(boetes) te maken?<br>Which object has wheels and is related to (traffic)/(fines)?                                                     |   |
|    | Welk object heeft met (het verkeer)/(boetes) te maken en heeft wielen?<br>Which object is related to (traffic)/(fines) and has wheels?                                                     |                                                                                       |
| 38 | Welk object is uitgestorven en (wordt als reptiel geclassificeerd)/(heeft een staart aan zijn lijf)?<br>Which object is extinct and (is classified as a reptile)/(has a tail on its body)? |  |
|    | Welk object (wordt als reptiel geclassificeerd)/(heeft een staart aan zijn lijf) en is uitgestorven?<br>Which object (is classified as a reptile)/(has a tail on its body) and is extinct? |                                                                                       |

|    |                                                                                                                                                                                                      |                                                                                       |
|----|------------------------------------------------------------------------------------------------------------------------------------------------------------------------------------------------------|---------------------------------------------------------------------------------------|
| 39 | Welk object heeft wielen en (kom je veel in het ziekenhuis tegen)/(is in de ouderenzorg belangrijk)?<br>Which object has wheels and (is often found in the hospital)/(is important in elderly care)? | 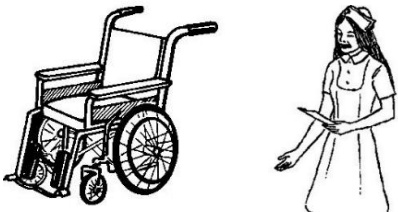   |
|    | Welk object (kom je veel in het ziekenhuis tegen)/(is in de ouderenzorg belangrijk) en heeft wielen?<br>Which object (is often found in the hospital)/(is important in elderly care) and has wheels? |                                                                                       |
| 40 | Welk object eet alleen vlees en (heeft strepen op zijn vacht)/(wordt als zoogdier geïdentificeerd)?<br>Which object only eats meat and (has stripes on its fur)/(is classified as a mammal)?         |    |
|    | Welk object (heeft strepen op zijn vacht)/(wordt als zoogdier geïdentificeerd) en eet alleen vlees?<br>Which object (has stripes on its fur)/(is classified as a mammal) and only eats meat?         |                                                                                       |
| 41 | Welk object heeft een tuit en heeft met (thee)/(warme dranken) te maken?<br>Which object has a spout and is related to (tea)/(hot drinks)?                                                           |    |
|    | Welk object heeft met (thee)/(warme dranken) te maken en heeft een tuit?<br>Which object is related to (tea)/(hot drinks) and has a spout?                                                           |                                                                                       |
| 42 | Welk object is neerslag en is (voor de herfst typerend)/(buiten te vinden)?<br>Which object is precipitation and (is characteristic for autumn)/(can be found outside)?                              |   |
|    | Welk object is (voor de herfst typerend)/(buiten te vinden) en is neerslag?<br>Which object (is characteristic for autumn)/(can be found outside) and is precipitation?                              |                                                                                       |
| 43 | Welk object is hoekig en (heeft met waarde te maken)/(kan blinkend zijn)?<br>Which object is angular and (is related to value)/(can be shiny)?                                                       |  |
|    | Welk object (heeft met waarde te maken)/(kan blinkend zijn) en is hoekig?<br>Which object (is related to value)/(can be shiny) and is angular?                                                       |                                                                                       |

|    |                                                                                                                                                                                   |                                                                                       |
|----|-----------------------------------------------------------------------------------------------------------------------------------------------------------------------------------|---------------------------------------------------------------------------------------|
| 44 | Welk object is een betaalmiddel en (is rond van vorm)/(heeft met schitteren te maken)?<br>Which object is a currency and (has a round shape)/(is related to shininess)?           | 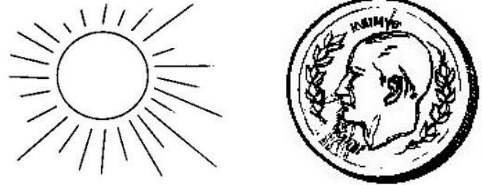   |
|    | Welk object (is rond van vorm)/(heeft met schitteren te maken) en is een betaalmiddel?<br>Which object (has a round shape)/(is related to shininess) and is a currency?           |                                                                                       |
| 45 | Welk object heeft een haak en kan (gebruikt worden om vissen te vangen)/(bij een sport gebruikt worden)?<br>Which object has a hook and can be used (to catch fish)/(for sports)? |    |
|    | Welk object kan (gebruikt worden om vissen te vangen)/(bij een sport gebruikt worden) en heeft een haak?<br>Which object can be used (to catch fish)/(for sports) and has a hook? |                                                                                       |
| 46 | Welk object heeft bulten en kan men in (Egypte)/(Noord-Afrika) tegenkomen?<br>Which object has humps and can be encountered in (Egypt)/(North Africa)?                            |    |
|    | Welk object kan men in (Egypte)/(Noord-Afrika) tegenkomen en heeft bulten?<br>Which object can be encountered in (Egypt)/(North Africa) and has humps?                            |                                                                                       |
| 47 | Welk object is levend en heeft met (vlees)/(een slager) te maken?<br>Which object is animate and is related to (meat)/(a butcher)?                                                |   |
|    | Welk object heeft met (vlees)/(een slager) te maken en is levend?<br>Which object is related to (meat)/(a butcher) and is animate?                                                |                                                                                       |
| 48 | Welk object is organisch en (heeft met bakken te maken)/(rond van vorm)?<br>Which object is organic and (is related to baking)/(has a round shape)?                               |  |
|    | Welk object (heeft met bakken te maken)/(is rond van vorm) en is organisch?<br>Which object (is related to baking)/(has a round shape) and is organic?                            |                                                                                       |

|    |                                                                                                                                                                                                                  |                                                                                       |
|----|------------------------------------------------------------------------------------------------------------------------------------------------------------------------------------------------------------------|---------------------------------------------------------------------------------------|
| 49 | Welk object kun je opblazen en heeft met (een feestje)/(iets vieren) te maken?<br>Which object can be blown up and is related to (a party)/(a celebration)?                                                      | 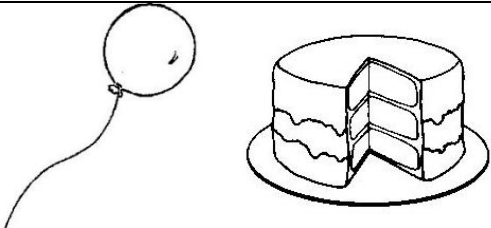   |
|    | Welk object heeft met (een feestje)/(iets vieren) te maken en kun je opblazen?<br>Which object is related to (a party)/(a celebration) and can be blown up?                                                      |                                                                                       |
| 50 | Welk object is menselijk en (is aan een voet gerelateerd)/(heeft met balans te maken)?<br>Which object is human and is related to (a foot)/(balance)?                                                            |    |
|    | Welk object (is aan een voet gerelateerd)/(heeft met balans te maken) en is menselijk?<br>Which object is related to (a foot)/(balance) and is human?                                                            |                                                                                       |
| 51 | Welk object is eetbaar en heeft met (film kijken)/(amusement) te maken?<br>Which object is edible and is related to (watching a film)/(amusement)?                                                               |    |
|    | Welk object heeft met (film kijken)/(entertainment) te maken en is eetbaar?<br>Which object is related to (watching a film)/(entertainment) and is edible?                                                       |                                                                                       |
| 52 | Welk object is levend en heeft iets met (rijkdom)/(belasting) te maken?<br>Which object is animate and is related to (wealth)/(taxes)?                                                                           |   |
|    | Welk object heeft iets met (rijkdom)/(belasting) te maken en is levend?<br>Which object is related to (wealth)/(taxes) and is animate?                                                                           |                                                                                       |
| 53 | Welk object is een voorstelling van het kwaad en wordt als onderdeel van (het geloof)/(het Christendom) beschouwd?<br>Which object is a depiction of evil and is considered a part of (religion)/(Christianity)? |  |
|    | Welk object wordt als onderdeel van (het geloof)/(het Christendom) beschouwd en is een voorstelling van het kwaad?<br>Which object is considered a part of (religion)/(Christianity) and is a depiction of evil? |                                                                                       |



|    |                                                                                                                                                                                                    |                                                                                       |
|----|----------------------------------------------------------------------------------------------------------------------------------------------------------------------------------------------------|---------------------------------------------------------------------------------------|
| 54 | Welk object is draagbaar en heeft met (schieten)/(kruit) te maken?<br>Which object is portable and is related to (shooting)/(gunpowder)?                                                           | 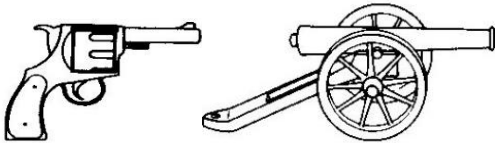   |
|    | Welk object heeft met (schieten)/(kruit) te maken en is draagbaar?<br>Which object is related to (shooting)/(gunpowder) and is portable?                                                           |                                                                                       |
| 55 | Welk object wordt gebruikt door een loodgieter en is (voor knijpen)/(uit metaal) gemaakt?<br>Which object is used by a plumber and (is made for grasping)/(is made out of metal)?                  |    |
|    | Welk object is (voor knijpen)/(uit metaal) gemaakt en wordt gebruikt door een loodgieter?<br>Which object (is made for grasping)/(is made out of metal) and is used by a plumber?                  |                                                                                       |
| 56 | Welk object heeft tralies en wordt (in de gevangenis)/(als vrijheidsbeperking) gebruikt?<br>Which object has bars and is used (in prison)/(for the restriction of freedom)?                        |    |
|    | Welk object wordt (in de gevangenis)/(als vrijheidsbeperking) gebruikt en heeft tralies?<br>Which object is used (in prison)/(for the restriction of freedom) and has bars?                        |                                                                                       |
| 57 | Welk object heeft een montuur en (is van glas gemaakt)/(moet zo nu en dan gepoetst worden)?<br>Which object has a frame and (is made out of glass)/(needs to be polished every once in a while)?   |   |
|    | Welk object (is van glas gemaakt)/(moet zo nu en dan gepoetst worden) en heeft een montuur?<br>Which object (is made out of glass)/(needs to be polished every once in a while) and has a frame?   |                                                                                       |
| 58 | Welk object is scherp en (wordt met een kapper geassocieerd)/(heeft met een nieuwe coupe te maken)?<br>Which object is sharp and (is associated with a hairdresser)/(is related to a new haircut)? |  |
|    | Welk object (wordt met een kapper geassocieerd)/(heeft met een nieuwe coupe te maken) en is scherp?<br>Which object (is associated with a hairdresser)/(is related to a new haircut) and is sharp? |                                                                                       |

|    |                                                                                                                                                                                                  |                                                                                                                                                                             |
|----|--------------------------------------------------------------------------------------------------------------------------------------------------------------------------------------------------|-----------------------------------------------------------------------------------------------------------------------------------------------------------------------------|
| 59 | Welk object is neerslag en heeft met (het weer)/(H <sub>2</sub> O) te maken?<br>Which object is precipitation and is related to (the weather)/(H <sub>2</sub> O)?                                |       |
|    | Welk object heeft met (het weer)/(H <sub>2</sub> O) te maken en is neerslag?<br>Which object is related to (the weather)/(H <sub>2</sub> O) and is precipitation?                                |                                                                                                                                                                             |
| 60 | Welk object is natuurlijk en kan met (hakken)/(een boswachter) geassocieerd worden?<br>Which object is natural and can be associated with (chopping)/(a forest ranger)?                          |       |
|    | Welk object kan met (hakken)/(een boswachter) geassocieerd worden en is natuurlijk?<br>Which object can be associated with (chopping)/(a forest ranger) and is natural?                          |                                                                                                                                                                             |
| 61 | Welk object heeft veel pagina's en heeft met (wijsheid)/(kennis) te maken?<br>Which object has many pages and is related to (wisdom)/(knowledge)?                                                |       |
|    | Welk object heeft met (wijsheid)/(kennis) te maken en heeft veel pagina's?<br>Which object is related to (wisdom)/(knowledge) and has many pages?                                                |                                                                                                                                                                             |
| 62 | Welk object is levenloos en heeft met (een sheriff)/(Amerika) te maken?<br>Which object is inanimate and is related to (a sheriff)/(America)?                                                    |     |
|    | Welk object heeft met (een sheriff)/(Amerika) te maken en is levenloos?<br>Which object is related to (a sheriff)/(America) and is inanimate?                                                    |                                                                                                                                                                             |
| 63 | Welk object leeft in de kou en (heeft een gewei op het hoofd)/(wordt vaak door jagers beschoten)?<br>Which object lives in the cold and (has antlers on its head)/(is often shot at by hunters)? |   |
|    | Welk object (heeft een gewei op het hoofd)/(wordt vaak door jagers beschoten) en leeft in de kou?<br>Which object (has antlers on its head)/(is often shot at by hunters) and lives in the cold? |                                                                                                                                                                             |

|    |                                                                                                                                                                                                              |                                                                                       |
|----|--------------------------------------------------------------------------------------------------------------------------------------------------------------------------------------------------------------|---------------------------------------------------------------------------------------|
| 64 | Welk object heeft een touw en (heeft met wind te maken)/(wordt vaak in de zomer gebruikt)?<br>Which object has a string and (is related to wind)/(is often used in summer)?                                  | 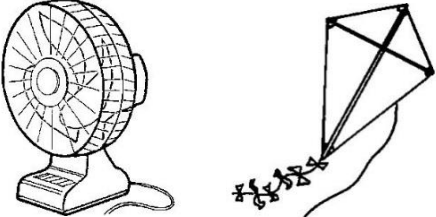   |
|    | Welk object (heeft met wind te maken)/(wordt vaak in de zomer gebruikt) en heeft een touw?<br>Which object (is related to wind)/(is often used in summer) and has a string?                                  |                                                                                       |
| 65 | Welk object gaat aan je voeten en wordt met (wintersport)/(langlaufen) gebruikt?<br>Which object goes on your feet and (is related to winter sports)/(is used for cross country skiing)?                     |    |
|    | Welk object wordt met (wintersport)/(langlaufen) gebruikt en gaat aan je voeten?<br>Which object (is related to winter sports)/(is used for cross country skiing) and goes on your feet?                     |                                                                                       |
| 66 | Welk object heeft kieuwen en (is in de zee te vinden)/(is gestroomlijnd van vorm)?<br>Which object has gills and (can be found in the sea)/(has a streamlined form)?                                         |    |
|    | Welk object (is in de zee te vinden)/(is gestroomlijnd van vorm) en heeft kieuwen?<br>Which object (can be found in the sea)/(has a streamlined form) and has gills?                                         |                                                                                       |
| 67 | Welk object is groente en (heeft met huilen te maken)/(wordt met irritatie geassocieerd)?<br>Which object is a vegetable and (is related to crying)/(associated with irritation)?                            |   |
|    | Welk object (heeft met huilen te maken)/(wordt met irritatie geassocieerd) en is groente?<br>Which (is related to crying)/(is associated with irritation) and is a vegetable?                                |                                                                                       |
| 68 | Welk object kan kwispelen en (wordt vaak als huisdier gehouden)/(zorgt soms voor allergie bij mensen)?<br>Which object can wag its tail and (is often kept as a pet)/(sometimes causes allergies in people)? |  |
|    | Welk object (wordt vaak als huisdier gehouden)/(zorgt soms voor allergie bij mensen) en kan kwispelen?<br>Which object (is often kept as a pet)/(sometimes causes allergies in people) and can wag its tail? |                                                                                       |

|    |                                                                                                                                                                                                               |                                                                                       |
|----|---------------------------------------------------------------------------------------------------------------------------------------------------------------------------------------------------------------|---------------------------------------------------------------------------------------|
| 69 | <p>Welk object is levenloos en (is op een trouwerij te vinden)/(heeft met traditie te maken)?<br/>Which object is inanimate and (can be found at a wedding)/(is related to tradition)?</p>                    | 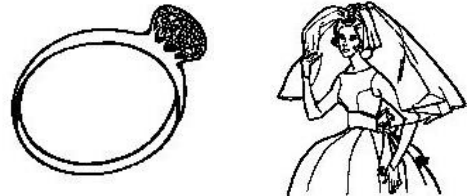   |
|    | <p>Welk object (is op een trouwerij te vinden)/(heeft met traditie te maken) en is levenloos?<br/>Which object (can be found at a wedding)/(is related to tradition) and is inanimate?</p>                    |                                                                                       |
| 70 | <p>Welk object zorgt voor malaria en wordt als (insect)/(beestje) geclassificeerd?<br/>Which object causes malaria and is classified as (an insect)/(a small animal)?</p>                                     |    |
|    | <p>Welk object wordt als (insect)/(beestje) geclassificeerd en zorgt voor malaria?<br/>Which object is classified as (an insect)/(a small animal) and causes malaria?</p>                                     |                                                                                       |
| 71 | <p>Welk object is rond en wordt vaak (in Italië)/(met kaas) gegeten?<br/>Which object is round and is often eaten (in Italy)/(with cheese)?</p>                                                               |    |
|    | <p>Welk object wordt vaak (in Italië)/(met kaas) gegeten en is rond?<br/>Which object is often eaten (in Italy)/(with cheese) and is round?</p>                                                               |                                                                                       |
| 72 | <p>Welk object is een wapen en (kom je tijdens een jacht tegen)/(heeft met een boswachter te maken)?<br/>Which object is a weapon and (can be encountered during a hunt)/(is related to a forest ranger)?</p> |   |
|    | <p>Welk object (kom je tijdens een jacht tegen)/(heeft met een boswachter te maken) en is een wapen?<br/>Which object (can be encountered during a hunt)/(is related to a forest ranger) and is a weapon?</p> |                                                                                       |
| 73 | <p>Welk object is een kledingstuk en kom je (op een kantoor)/(bij een baan) veel tegen?<br/>Which object is a garment and is often found (at an office)/(at a job)?</p>                                       |  |
|    | <p>Welk object kom je (op een kantoor)/(bij een baan) veel tegen en is een kledingstuk?<br/>Which object is often found (at an office)/(at a job) and is a garment?</p>                                       |                                                                                       |

|    |                                                                                                                                                                     |                                                                                                                                                                             |
|----|---------------------------------------------------------------------------------------------------------------------------------------------------------------------|-----------------------------------------------------------------------------------------------------------------------------------------------------------------------------|
| 74 | Welk object is een mens en (is in de kerk te vinden)/(is bij een mis belangrijk)?<br>Which object is a human and (can be found in church)/(is important at a mass)? |       |
|    | Welk object (is in de kerk te vinden)/(is bij een mis belangrijk) en is een mens?<br>Which object (can be found in church)/(is important at a mass) and is a human? |                                                                                                                                                                             |
| 75 | Welk object zweeft en heeft te maken met iemand die (dood is gegaan)/(overleden is)?<br>Which object floats and is related to someone who has (died)/(passed away)? |       |
|    | Welk object heeft te maken met iemand die (dood is gegaan)/(overleden is) en zweeft?<br>Which object is related to someone who has (died)/(passed away) and floats? |                                                                                                                                                                             |
| 76 | Welk object heeft kookpitten en heeft met (koken)/(bereiden) te maken?<br>Which object has cookers and is related to (cooking)/(preparation)?                       |       |
|    | Welk object heeft met (koken)/(bereiden) te maken en heeft kookpitten?<br>Which object is related to (cooking)/(preparation) and has cookers?                       |                                                                                                                                                                             |
| 77 | Welk object heeft deuren en is voor je (kleren)/(garderobe) gemaakt?<br>Which object has doors and is made for your (clothes)/(garments)?                           |     |
|    | Welk object is voor je (kleren)/(garderobe) gemaakt en heeft deuren?<br>Which object is made for your (clothes)/(garments) and has doors?                           |                                                                                                                                                                             |
| 78 | Welk object heeft tanden en wordt (als gereedschap gebruikt)/(gebruikt om meubels te maken)?<br>Which object has cogs and is used (as a tool)/(to make furniture)?  |   |
|    | Welk object wordt (als gereedschap gebruikt)/(gebruikt om meubels te maken) en heeft tanden?<br>Which object is used (as a tool)/(to make furniture) and has cogs?  |                                                                                                                                                                             |

|    |                                                                                                                                                                                                              |                                                                                       |
|----|--------------------------------------------------------------------------------------------------------------------------------------------------------------------------------------------------------------|---------------------------------------------------------------------------------------|
| 79 | Welk object heeft manen en (staat voor koning symbool)/(heeft met een rang te maken)?<br>Which object has a mane and (symbolizes the king)/(is related to rank)?                                             | 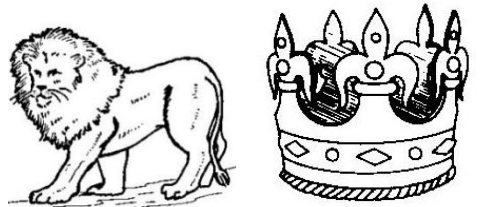   |
|    | Welk object (staat voor koning symbool)/(heeft met een rang te maken) en heeft manen?<br>Which object (symbolizes the king)/(is related to rank) and has a mane?                                             |                                                                                       |
| 80 | Welk object heeft een snavel en (brengt zijn leven in de kou door)/(maakt van goede isolatie gebruik)?<br>Which object has a beak and (spends its life in the cold)/(makes use of good insulation)?          |    |
|    | Welk object (brengt zijn leven in de kou door)/(maakt van goede isolatie gebruik) en heeft een snavel?<br>Which object (spends its life in the cold)/(makes use of good insulation) and has a beak?          |                                                                                       |
| 81 | Welk object is gemaakt van leer en (wordt gebruikt voor het vastmaken van iets)/(kan strak zitten)?<br>Which object is made out of leather and (is used to secure something in place)/(can strain a little)? |    |
|    | Welk object (wordt gebruikt voor het vastmaken van iets)/(kan strak zitten) en is gemaakt van leer?<br>Which object (is used to secure something in place)/(can strain a little) and is made out of leather? |                                                                                       |
| 82 | Welk object is slijmerig en (is erg langzaam met verplaatsen)/(heeft zijn huisje bij zich)?<br>Which object is slimy and (moves very slowly)/(carries its little house)?                                     |   |
|    | Welk object (is erg langzaam met verplaatsen)/(heeft zijn huisje bij zich) en is slijmerig?<br>Which object (moves very slowly)/(carries its little house) and is slimy?                                     |                                                                                       |
| 83 | Welk object vind je op feestjes en heeft met (lucht)/(gewichtloos) te maken?<br>Which object can be found at parties and is related to (air)/(weightlessness)?                                               |  |
|    | Welk object heeft met (lucht)/(gewichtloos) te maken en vind je op feestjes?<br>Which object is related to (air)/(weightlessness) and can be found at parties?                                               |                                                                                       |

|    |                                                                                                                                                                                                                                                                          |                                                                                      |
|----|--------------------------------------------------------------------------------------------------------------------------------------------------------------------------------------------------------------------------------------------------------------------------|--------------------------------------------------------------------------------------|
| 84 | <p>Welk object is bedoeld voor één persoon en is voor (zitten)/(uitrusten) gemaakt?<br/>Which object is meant for one person and made for (sitting)/(resting)?</p>                                                                                                       | 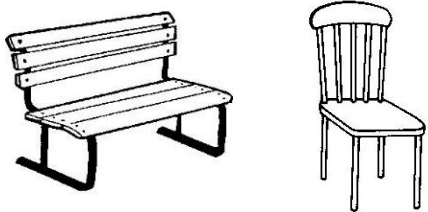  |
|    | <p>Welk object is voor (zitten)/(uitrusten) gemaakt en is bedoeld voor één persoon?<br/>Which object is made for (sitting)/(resting) and is meant for one person?</p>                                                                                                    |                                                                                      |
| 85 | <p>Welk object leent zich meer voor klassieke muziek en (heeft snaren als belangrijkste onderdeel)/(wordt bij concerten gebruikt)?<br/>Which object is more suitable for playing classical music and (has strings as its most important part)/(is used at concerts)?</p> |   |
|    | <p>Welk object (heeft snaren als belangrijkste onderdeel)/(wordt bij concerten gebruikt) en leent zich meer voor klassieke muziek?<br/>Which object (has strings as its most important part)/(is used at concerts) and is more suitable for playing classical music?</p> |                                                                                      |
| 86 | <p>Welk object is draagbaar en (heeft toetsen als onderdeel)/(kan bespeeld worden)?<br/>Which object is portable and (has keys as one of its components)/(can be played on)?</p>                                                                                         |   |
|    | <p>Welk object (heeft toetsen als onderdeel)/(kan bespeeld worden) en is draagbaar?<br/>Which object (has keys as one of its components)/(can be played on) and is portable?</p>                                                                                         |                                                                                      |
| 87 | <p>Welk object wordt gebruikt in de astronomie en heeft met (vergroten)/(de wetenschap) te maken?<br/>Which object is used in astronomy and is related to (magnification)/(science)?</p>                                                                                 |  |
|    | <p>Welk object heeft met (vergroten)/(de wetenschap) te maken en wordt gebruikt in de astronomie?<br/>Which object is related to (magnification)/(science) and is used in astronomy?</p>                                                                                 |                                                                                      |

|    |                                                                                                                                                                                                                        |                                                                                       |
|----|------------------------------------------------------------------------------------------------------------------------------------------------------------------------------------------------------------------------|---------------------------------------------------------------------------------------|
| 88 | <p>Welk object kan rijden en (wordt in de oorlog gebruikt)/(wordt gebruikt om slachtoffers te maken)?<br/>Which object can be driven and is used (during war)/(to make victims)?</p>                                   | 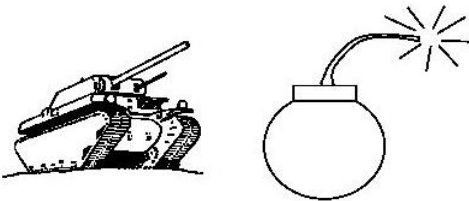   |
|    | <p>Welk object (wordt in de oorlog gebruikt)/(wordt gebruikt om slachtoffers te maken) en kan rijden?<br/>Which object is used (during war)/(to make victims) and can drive?</p>                                       |                                                                                       |
| 89 | <p>Welk object heeft een standaard en heeft met (muziek)/(radio) te maken?<br/>Which object has a stand and is related to (music)/(radio)?</p>                                                                         |    |
|    | <p>Welk object heeft met (muziek)/(radio) te maken en heeft een standaard?<br/>Which object is related to (music)/(radio) and has a stand?</p>                                                                         |                                                                                       |
| 90 | <p>Welk object heeft een klok en hoort bij het (opstaan)/(ritueel) in de ochtend?<br/>Which object has a clock and is associated with (getting up in the morning)/(the morning routine)?</p>                           |    |
|    | <p>Welk object hoort bij het (opstaan)/(ritueel) in de ochtend en heeft een klok?<br/>Which object is associated with (getting up in the morning)/(the morning routine) and has a clock?</p>                           |                                                                                       |
| 91 | <p>Welk object is gewelddadig en (kan voor een paard gebruikt worden)/(heeft met domesticeren te maken)?<br/>Which object is violent and (can be used on a horse)/(is related to domestication)?</p>                   |   |
|    | <p>Welk object (kan voor een paard gebruikt worden)/(heeft met domesticeren te maken) en is gewelddadig?<br/>Which object (can be used on a horse)/(is related to domestication) and is violent?</p>                   |                                                                                       |
| 92 | <p>Welk object is gemaakt van glas en (kun je naar een picknick meenemen)/(heeft met genieten te maken)?<br/>Which object is made out of glass and (can be brought to a picnic)/(is related to enjoying yourself)?</p> |  |
|    | <p>Welk object (kun je naar een picknick meenemen)/(heeft met genieten te maken) en is gemaakt van glas?<br/>Which object (can be brought to a picnic)/(is related to enjoying yourself) and is made out of glass?</p> |                                                                                       |



|    |                                                                                                                                                                                                                                                         |                                                                                      |
|----|---------------------------------------------------------------------------------------------------------------------------------------------------------------------------------------------------------------------------------------------------------|--------------------------------------------------------------------------------------|
| 93 | <p>Welk object wordt vaak gegeten met Thanksgiving en (wordt tot gevogelte gerekend)/(heeft een snavel als onderdeel)?<br/>         Which object is often eaten at Thanksgiving and (is considered poultry)/(has a beak as one of its components)?</p>  | 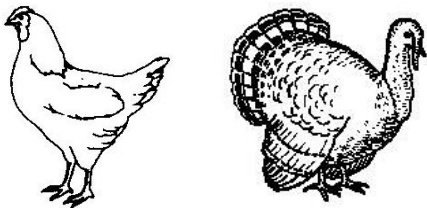  |
|    | <p>Welk object (wordt tot gevogelte gerekend)/(heeft een snavel als onderdeel) en wordt vaak gegeten met Thanksgiving?<br/>         Which object (is considered poultry)/ (has a beak as one of its components) and is often eaten at Thanksgiving?</p> |                                                                                      |
| 94 | <p>Welk object heeft een afzender en heeft met (post)/(een adres) te maken?<br/>         Which object has a sender and is related to (mail)/(an address)?</p>                                                                                           |   |
|    | <p>Welk object heeft met (post)/(een adres) te maken en heeft een afzender?<br/>         Which object is related to (mail)/(an address) and has a sender?</p>                                                                                           |                                                                                      |
| 95 | <p>Welk object heeft veren en heeft met (praten)/(spreken) te maken?<br/>         Which object has feathers and is related to (talking)/(speaking)?</p>                                                                                                 |   |
|    | <p>Welk object heeft met (praten)/(spreken) te maken en heeft veren?<br/>         Which object is related to (talking)/(speaking) and has feathers?</p>                                                                                                 |                                                                                      |
| 96 | <p>Welk object heeft oren en (wordt als prijs uitgereikt)/(is vaak goud van kleur)?<br/>         Which object has handles and (is awarded as a prize)/(often has a golden color)?</p>                                                                   |  |
|    | <p>Welk object (wordt als prijs uitgereikt)/(is vaak goud van kleur) en heeft oren?<br/>         Which object (is awarded as a prize)/(often has a golden color ) and has handles?</p>                                                                  |                                                                                      |

|     |                                                                                                                                                                                                         |                                                                                       |
|-----|---------------------------------------------------------------------------------------------------------------------------------------------------------------------------------------------------------|---------------------------------------------------------------------------------------|
| 97  | Welk object loopt en (voelt stekelig aan)/(veroorzaakt pijn bij aanraking)?<br>Which object can walk and (feels prickly)/(causes pain when touched)?                                                    | 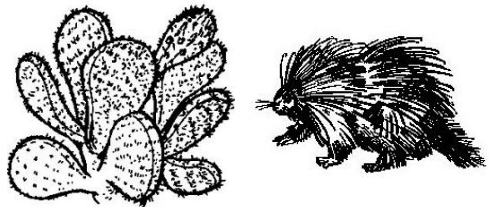   |
|     | Welk object (voelt stekelig aan)/(veroorzaakt pijn bij aanraking) en loopt?<br>Which object (feels prickly)/(causes pain when touched) and can walk?                                                    |                                                                                       |
| 98  | Welk object heeft poten en (staat om zijn gif bekend)/(wordt als een exotisch dier gezien)?<br>Which object has paws and is (known for its poison)/(seen as an exotic animal)?                          |    |
|     | Welk object (staat om zijn gif bekend)/(wordt als een exotisch dier gezien) en heeft poten?<br>Which object is (known for its poison)/(seen as an exotic animal) and has paws?                          |                                                                                       |
| 99  | Welk object is levenloos en (is in een restaurant te vinden)/(is een onderdeel van het opdienen van eten)?<br>Which object is inanimate and (can be found in a restaurant)/(is part of serving dinner)? |    |
|     | Welk object (is in een restaurant te vinden)/(is een onderdeel van het opdienen van eten) en is levenloos?<br>Which object (can be found in a restaurant)/(is part of serving dinner) and is inanimate? |                                                                                       |
| 100 | Welk object is brandbaar en heeft met (roken)/(tabak) te maken?<br>Which object is flammable and is related to (smoking)/(tobacco)?                                                                     |   |
|     | Welk object heeft met (roken)/(tabak) te maken en is brandbaar?<br>Which object is related to (smoking)/(tobacco) and is flammable?                                                                     |                                                                                       |
| 101 | Welk object heeft een staart en heeft (scharen als handen)/(een exoskelet om zijn lichaam)?<br>Which object has a tail and has (claws instead of hands)/(an exoskeleton surrounding its body)?          |  |
|     | Welk object heeft (scharen als handen)/(een exoskelet om zijn lichaam) en heeft een staart?<br>Which object has (claws instead of hands)/(an exoskeleton surrounding its body) and has a tail?          |                                                                                       |

|     |                                                                                                                                                                                                              |                                                                                      |
|-----|--------------------------------------------------------------------------------------------------------------------------------------------------------------------------------------------------------------|--------------------------------------------------------------------------------------|
| 102 | Welk object verbruikt water en zorgt voor (het schoonmaken van je spullen)/(lawaaai als het aan staat)?<br>Which object uses water and (helps you clean your things)/(causes a lot of noise when turned on)? | 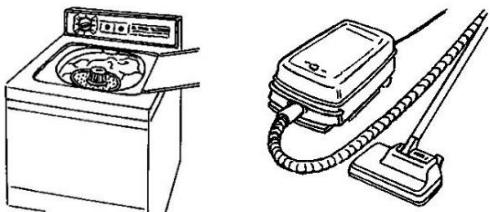  |
|     | Welk object zorgt (het schoonmaken van je spullen)/(lawaaai als het aan staat) en verbruikt water?<br>Which object (helps you clean your things)/(causes a lot of noise when turned on) and uses water?      |                                                                                      |
| 103 | Welk object heeft toetsen en wordt (door een schrijver)/(met papier) gebruikt?<br>Which object has keys and is used (by a writer)/(with paper)?                                                              |   |
|     | Welk object wordt (door een schrijver)/(met papier) gebruikt en heeft toetsen?<br>Which object is used (by a writer)/(with paper) and has keys?                                                              |                                                                                      |
| 104 | Welk object kun je kammen en is met (wassen)/(afspoelen) geassocieerd?<br>Which object can be combed and is associated with (washing)/(rinsing)?                                                             |   |
|     | Welk object is met (wassen)/(afspoelen) geassocieerd en kun je kammen?<br>Which object is associated with (washing)/(rinsing) and can be combed?                                                             |                                                                                      |
| 105 | Welk object kun je eten en heeft met (Sinterklaas <sup>3</sup> )/(de grond) te maken?<br>Which object is edible and is related to (Sinterklaas)/(the ground)?                                                |  |
|     | Welk object heeft met (Sinterklaas)/(de grond) te maken en kun je eten?<br>Which object is related to (Sinterklaas)/(the ground) and is edible?                                                              |                                                                                      |

<sup>3</sup> During Dutch Sinterklaas (St. Nicolas) celebrations (comparable to Santa Klaus), children leave carrots in their shoes for St. Nicholas' horse, hoping that they will be replaced with candy overnight.

|     |                                                                                                                                                                                              |                                                                                       |
|-----|----------------------------------------------------------------------------------------------------------------------------------------------------------------------------------------------|---------------------------------------------------------------------------------------|
| 106 | Welk object is langwerpig en (wordt als groente verbouwd)/(kun je in de tuin verbouwen)?<br>Which object is elongated and (is cultivated as a vegetable)/(can be grown in your garden)       | 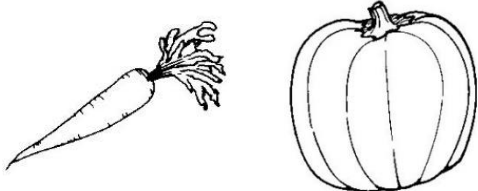   |
|     | Welk object (wordt als groente verbouwd)/(kun je in de tuin verbouwen) en is langwerpig?<br>Which object (is cultivated as a vegetable)/(can be grown in your garden) and is elongated?      |                                                                                       |
| 107 | Welk object zit aan de voorkant en heeft met (een zintuig)/(prikkels) te maken?<br>Which object is located on the front and is related to a (sense)/(stimuli)?                               |    |
|     | Welk object heeft met (een zintuig)/(prikkels) te maken en zit aan de voorkant?<br>Which object is related to (a sense)/(stimuli) and is located on the front?                               |                                                                                       |
| 108 | Welk object is een voorwerp en (wordt met dokters geassocieerd)/(heeft met zorg te maken)?<br>Which object is a device and is (associated with doctors)/(related to care)?                   |    |
|     | Welk object (wordt met dokters geassocieerd)/(heeft met zorg te maken) en is een voorwerp?<br>Which object is (associated with doctors)/(related to care) and is a device?                   |                                                                                       |
| 109 | Welk object is te vinden in een kerstboom en is (in de nacht)/(vaak op een vlag) te zien?<br>Which object can be found in a Christmas tree and is (visible at night)/(often seen on a flag)? |   |
|     | Welk object is (in de nacht)/(vaak op een vlag) te zien en is te vinden in een kerstboom?<br>Which object is (visible at night)/(often seen on a flag) and can be found in a Christmas tree? |                                                                                       |
| 110 | Welk object heeft te maken met water en (is een zwaar voorwerp)/(is door een smid gemaakt)?<br>Which object is related to water and (is a heavy device)/(is made by a blacksmith)?           |  |
|     | Welk object (is een zwaar voorwerp)/(is door een smid gemaakt) en heeft te maken met water?<br>Which object (is a heavy device)/(is made by a blacksmith) and is related to water?           |                                                                                       |

|     |                                                                                                                                                                                         |                                                                                      |
|-----|-----------------------------------------------------------------------------------------------------------------------------------------------------------------------------------------|--------------------------------------------------------------------------------------|
| 111 | Welk object leeft en (voelt harig aan)/(heeft goede isolatie tegen de kou)?<br>Which object is animate and (feels hairy)/(is well-insulated against the cold)?                          | 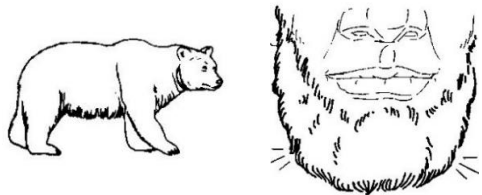  |
|     | Welk object (voelt harig aan)/(heeft goede isolatie tegen de kou) aan en leeft?<br>Which object (feels hairy)/(is well-insulated against the cold) and is animate?                      |                                                                                      |
| 112 | Welk object is een woning en heeft met (Indianen)/(geschiedenis) te maken?<br>Which object is a home and is related to (Native Americans)/(history)?                                    |   |
|     | Welk object heeft met (Indianen)/(geschiedenis) te maken en is een woning?<br>Which object is related to (Native Americans)/(history) and is a home?                                    |                                                                                      |
| 113 | Welk object wordt gebruikt in de keuken en heeft een (scherp onderdeel)/(lemmet als onderdeel)?<br>Which object is used in the kitchen and has a (sharp component)/(blade as its part)? |   |
|     | Welk object heeft een (scherp onderdeel)/(lemmet als onderdeel) en wordt gebruikt in de keuken?<br>Which object has a (sharp component)/(blade as its part) and is used in the kitchen? |                                                                                      |
| 114 | Welk object is voor je geld en (is van leer gemaakt)/(bij de V&D <sup>4</sup> te koop)?<br>Which object is made for your money and (is made out of leather)/(is for sale at the V&D)?   |  |
|     | Welk object (is van leer gemaakt)/(bij de V&D te koop) en is voor je geld?<br>Which object (is made out of leather)/(is for sale at the V&D) and is made for your money?                |                                                                                      |

<sup>4</sup> V&D was a popular department store in the Netherlands at the time of this study.

|     |                                                                                                                                                                                                                                               |                                                                                      |
|-----|-----------------------------------------------------------------------------------------------------------------------------------------------------------------------------------------------------------------------------------------------|--------------------------------------------------------------------------------------|
| 115 | <p>Welk object vind je in de badkamer en heeft met (water)/(een kraan) te maken?<br/>Which object can be found in the bathroom and is related to (water)/(a tap)?</p>                                                                         |   |
|     | <p>Welk object heeft met (water)/(een kraan) te maken en vind je in de badkamer?<br/>Which object is related to (water)/(a tap) and can be found in the bathroom?</p>                                                                         |                                                                                      |
| 116 | <p>Welk object is organisch en (is meestal rood van kleur)/(kan vlekken geven)?<br/>Which object is organic and (usually has a red color)/(can stain)?</p>                                                                                    |   |
|     | <p>Welk object (is meestal rood van kleur)/(kan vlekken geven) en is organisch?<br/>Which object (usually has a red red color)/(can stain) and is organic?</p>                                                                                |                                                                                      |
| 117 | <p>Welk object is gemaakt voor baby's en (heeft wielen aan de onderkant)/(kan als vervoermiddel geassocieerd worden)?<br/>Which object is made for babies and (has wheels on the bottom)/(can be classified as a mode of transportation)?</p> |   |
|     | <p>Welk object (heeft wielen aan de onderkant)/(kan als vervoermiddel geassocieerd worden) en is gemaakt voor baby's?<br/>Which object (has wheels on its bottom)/(can be classified as a mode of transportation) and is made for babies?</p> |                                                                                      |
| 118 | <p>Welk object is een onderstuk en is (voor vrouwen)/(van stof) gemaakt?<br/>Which object is worn on the lower half of the body and is made (for women)/(out of fabric)?</p>                                                                  |  |
|     | <p>Welk object is (voor vrouwen)/(van stof) gemaakt en is een onderstuk?<br/>Which object is made (for women)/(out of fabric) and is worn on the lower half of the body?</p>                                                                  |                                                                                      |

|     |                                                                                                                                                           |                                                                                     |
|-----|-----------------------------------------------------------------------------------------------------------------------------------------------------------|-------------------------------------------------------------------------------------|
| 119 | <p>Welk object heeft wieken en (draait)/(beweegt) als het wordt gebruikt?<br/>         Which object has blades and (turns)/(moves) when in use?</p>       | 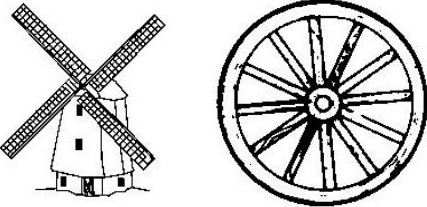 |
|     | <p>Welk object (draait)/(beweegt) als het wordt gebruikt en heeft wieken?<br/>         Which object (turns)/(moves) when in use and has blades?</p>       |                                                                                     |
| 120 | <p>Welk object is krom en wordt als (fruit)/(gezond) gezien?<br/>         Which object is curved and is considered (a type of fruit)/(to be healthy)?</p> |  |
|     | <p>Welk object wordt als (fruit)/(gezond) gezien en is krom?<br/>         Which object is considered (a type of fruit)/(to be healthy) and is curved?</p> |                                                                                     |
